# Supplementary material
Source: publisher figshare collection journal article supplement (https://acs.figshare.com/ndownloader/files/15136019)
Supplement: Supplementary file 1 [file 15136019]

# Supporting Information

## Insights for realizing ultrasensitive colorimetric detection of glucose based on carbon/silver core/shell nanodots

Po-Hsuan Hsiao,<sup>1</sup> Chia-Yun Chen<sup>1,2\*</sup>

<sup>1</sup> Department of Materials Science and Engineering, National Cheng Kung University, Tainan 70101, Taiwan

<sup>2</sup> Hierarchical Green-Energy Materials (Hi-GEM) Research Center, National Cheng Kung University, Tainan 70101, Taiwan

\*E-mail: [timcychen@mail.ncku.edu.tw](mailto:timcychen@mail.ncku.edu.tw)

### S-1 Elemental composition analysis of core/shell nanodots

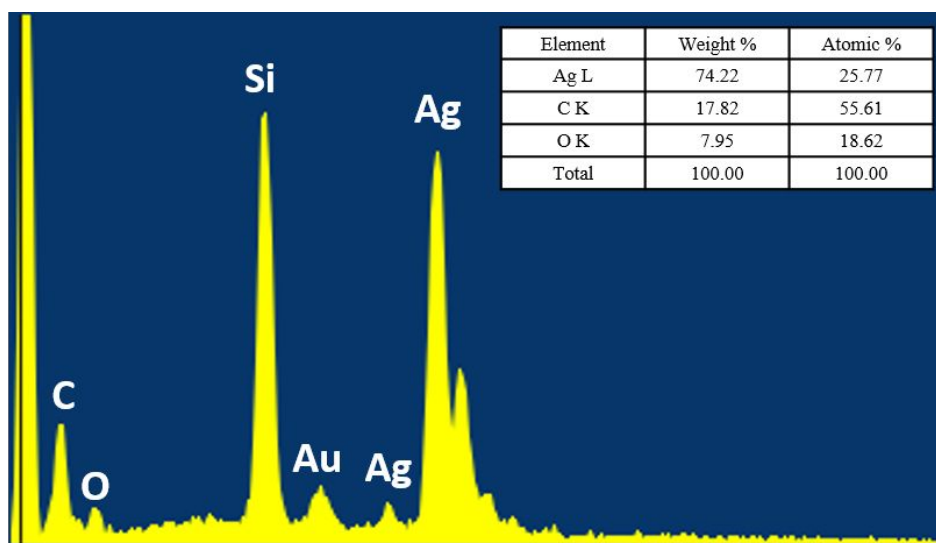

**Figure S1.** EDS analysis of C/Ag core/shell nanodots. The quantitative analysis was shown in the inserted figure.

S-2 Sensing process based on the designed core/shell nanostructures.

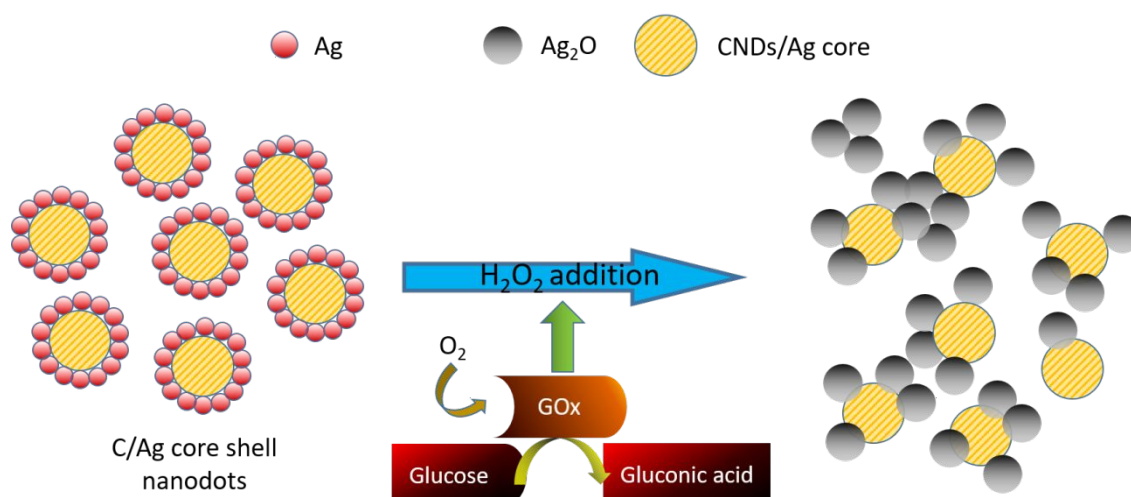

**Figure S2.** Illustration of sensing glucose based on colorimetric detection using C/Ag core/shell nanodots.

S-3 Possible reaction of  $H_2O_2$  generation with  $GO_x$  mediation

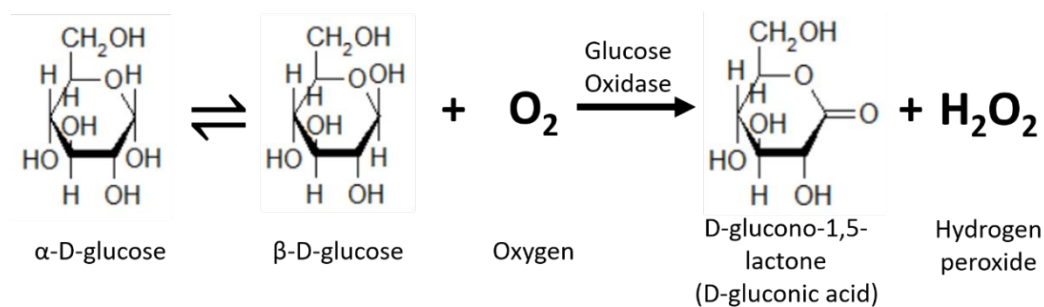

**Figure S3.** Possible instant reaction of glucose catalyzed with the glucose oxidase. Accordingly,  $H_2O_2$  molecules were generated and initiated the color change of C/Ag core/shell indicators.

#### S-4 Reliability examination of glucose sensors based on core/shell nanodots

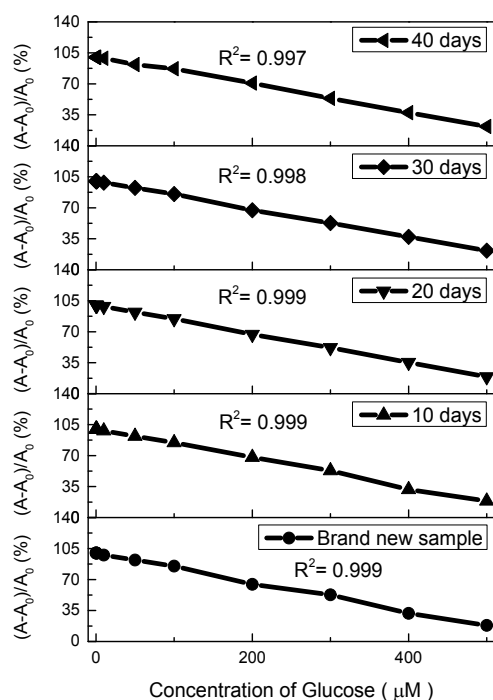

**Figure S4.** The duration test (0-40 days) of C/Ag core/shell nanodots under various concentrations of glucose.

#### S-5 Analysis of particle size

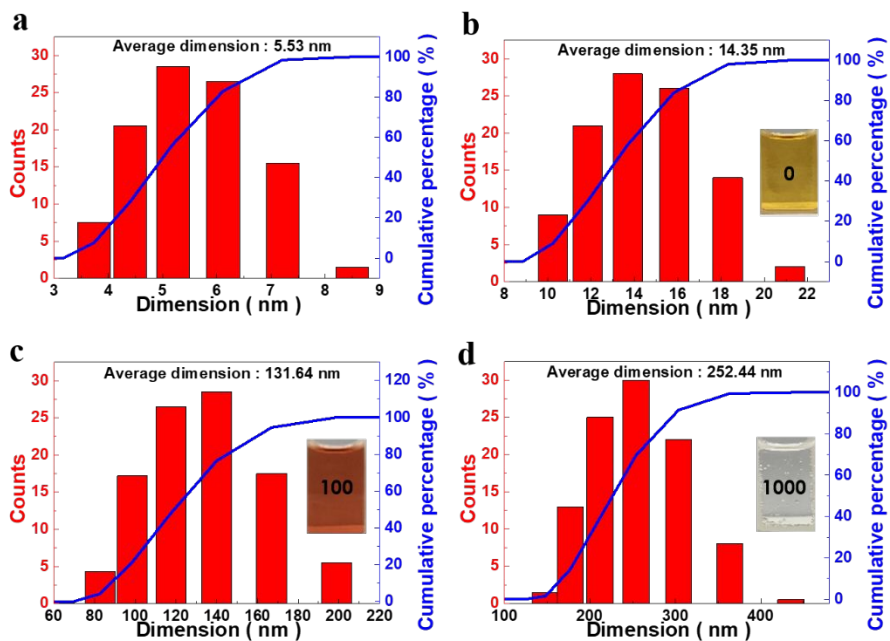

**Figure S5.** DLS measured results of (a) CNDs, (b) C/Ag core/shell nanodots without and with (c) 100  $\mu\text{M}$  and (d) 1000  $\mu\text{M}$  of  $\text{H}_2\text{O}_2$  addition.

S-6 TEM investigations of C/Ag core/shell nanodots with H<sub>2</sub>O<sub>2</sub> addition

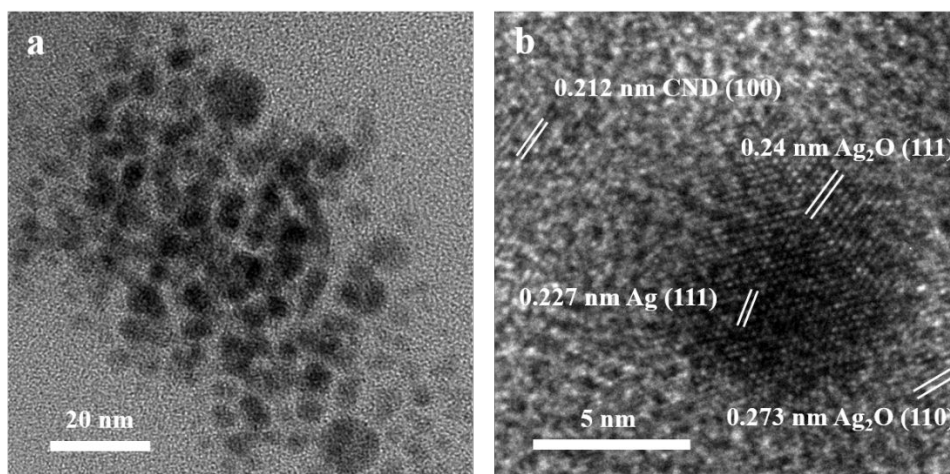

**Figure S6.** (a) Representative TEM and (b) HRTEM images of C/Ag core/shell nanodots with 1000  $\mu\text{M}$  of H<sub>2</sub>O<sub>2</sub> addition.

S-7 Crystallographic characterizations of samples with and without H<sub>2</sub>O<sub>2</sub> additions

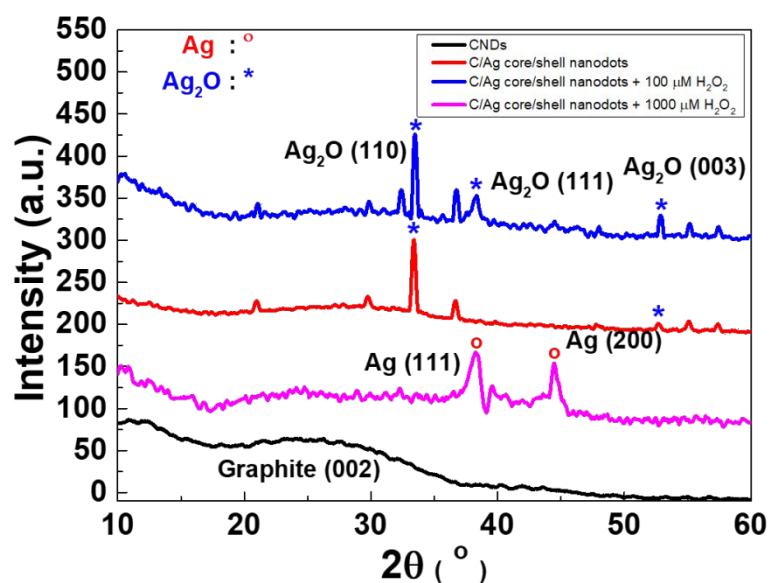

**Figure S7.** XRD patterns of CNDs, C/Ag core/shell nanodots without and with 100 and 1000  $\mu\text{M}$  of H<sub>2</sub>O<sub>2</sub> addition.

## S-8 Examinations of optimal condition for preparing C/Ag core/shell nanostructures

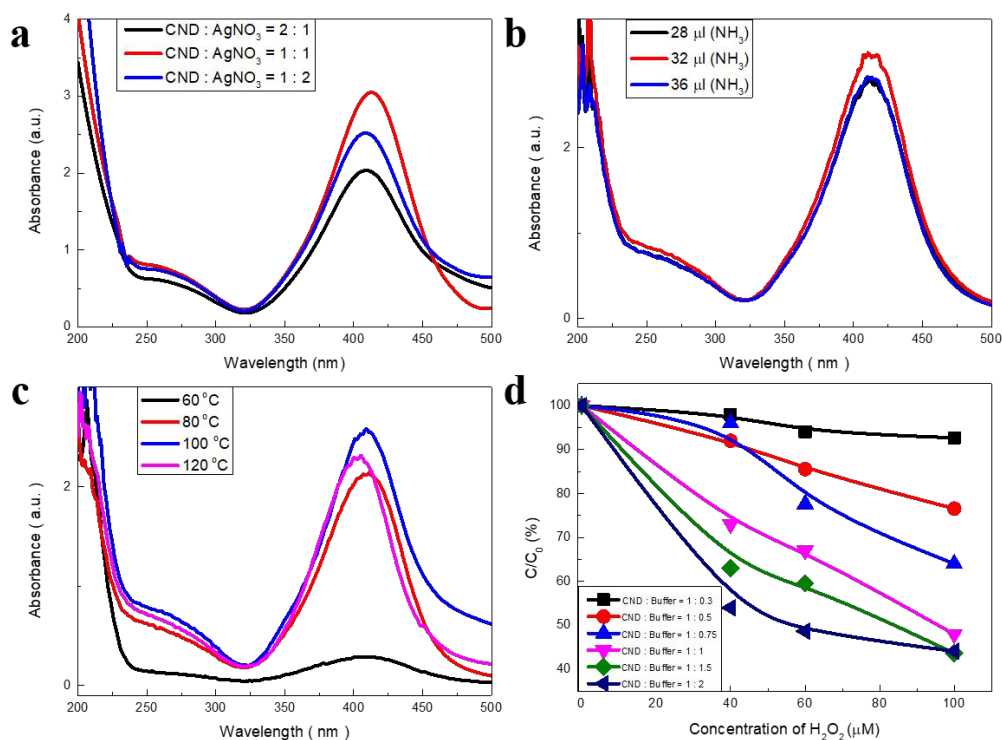

**Figure S8.** Examinations of optimal condition for the preparation of C/Ag core/shell nanostructures. (a) The ratio of CND to AgNO<sub>3</sub> reagents, (b) the amount of the NH<sub>3</sub> used in preparation, (c) the temperature of thermal treatment and (d) the addition of BF buffer solutions. The results displayed that the optimal condition for preparing C/Ag core-shell nanodots were, CND:AgNO<sub>3</sub> = 1:1, 32  $\mu$ L of NH<sub>3</sub> and 100°C for thermal treatment. The ratio of C/Ag core-shell nanodots : BF buffer solution = 1:1 was found to be optimal due to the straight correlation line. ( $R_2 = 0.997$ ).
